# Supplementary material
Source: publisher figshare collection journal article supplement (https://rs.figshare.com/ndownloader/files/9478927)
Supplement: Supplementary file 1 [file 9478927]

## Sheet: Suppl table within region
COI Pairwise FST distance among the N. australe distinc populations within the Antarctic regions
Within Antarctic Peninula
	1	2	3
1	0
2	0.03821	0
3	0.31065	0.16906	0
1	Southernmost Antarctic Peninsula populations
2	Western Antarctic Peninsula populations
3	North-Eastern Antarctic Peninsula populations
Within Antarctic Islands
	1	2
1	0
2	0.57547	0
1	Bouvet Island
2	South Sandwitch Islands
Within Weddell Sea
	1	2
1	0
2	0.03411	0
1	Easternmost populations (BEN)
2	Westernmost populations (POL)
Analysis of molecular variance (AMOVA) and degrees of freedom (df) for N. autrale COI data within each Antarctic region
Within Antarctic Peninula
Source of variation	d.f.	Sum of squares	Variance components	Percentatge of variation
Among populations	2	9.326	0.12693	8.2
Within populations	92	130.779	1.42151	91.8
Total	94	140.105	1.54845
FST	0.08197
Within Antarctic Islands
Source of variation	d.f.	Sum of squares	Variance components	Percentatge of variation
Among groups	1	4.204	0.64079	60.35
Among populations within groups	4	1.283	-0.10277	-9.68
Within populations	7	3.667	0.52381	49.33
Total	12	9.154	1.06152
FST	0.50669
Within Weddell Sea
Source of variation	d.f.	Sum of squares	Variance components	Percentatge of variation
Among populations	1	0.547	0.01282	3.41
Within populations	27	9.798	0.36289	96.59
Total	28	10.345	0.37571
FST	0.03411
In bold values statistical significant at 0.05

## Sheet: pen RAW DATA
AMOVA ANALYSIS
=================================================================
---------------------------
Genetic structure to test :
---------------------------
No. of Groups = 1
[[Structure]]
StructureName = "Pooled flat structure"
NbGroups = 1
#Group1
Group={
"Group1"
"Group2"
"Group3"
}
---------------------------
Distance method: Pairwise difference
--------------------------
AMOVA design and results :
--------------------------
Weir, B.S. and Cockerham, C.C. 1984.
Excoffier, L., Smouse, P., and Quattro, J. 1992.
Weir, B. S., 1996.
----------------------------------------------------------------------
Source of Sum of Variance Percentage
variation d.f. squares components of variation
----------------------------------------------------------------------
Among
populations 2 9.326 0.12693 Va 8.20
Within
populations 92 130.779 1.42151 Vb 91.80
----------------------------------------------------------------------
Total 94 140.105 1.54845
----------------------------------------------------------------------
Fixation Index FST : 0.08197
----------------------------------------------------------------------
Significance tests (1023 permutations)
------------------
Va and FST : P(rand. value > obs. value) = 0.01173
P(rand. value = obs. value) = 0.00000
P-value = 0.01173+-0.00304
List of labels for population samples used below:
-------------------------------------------------
Label Population name
----- ---------------
1: Group1
2: Group2
3: Group3
------------------------
Population pairwise FSTs
------------------------
Distance method: Pairwise difference
1 2 3
1 0.00000
2 0.03821 0.00000
3 0.31065 0.16906 0.00000
------------
FST P values
------------
Number of permutations : 110
1 2 3
1 *
2 0.06306+-0.0194 *
3 0.00901+-0.0091 0.05405+-0.0201 *
------------
Matrix of significant Fst P values
Significance Level=0.0500
------------
Number of permutations : 110
1 2 3
1 - +
2 - -
3 + -

## Sheet: pen FST AMOVA
		Within Antarcti Peninula
		1	2	3
	1	0
	2	0.03821	0
	3	0.31065	0.16906	0
	1	Southernmost Antarctic Peninsula populations
	2	Western Antarctic Peninsula populations
	3	North-Eastern Antarctic Peninsula populations
		Source of variation	d.f.	Sum of squares	Variance components	Percentatge of variation
		Among populations	2	9.326	0.12693	8.2
		Within populations	92	130.779	1.42151	91.8
		Total	94	140.105	1.54845
		FST	0.08197

## Sheet: raw data ai
AMOVA ANALYSIS
=================================================================
---------------------------
Genetic structure to test :
---------------------------
No. of Groups = 1
[[Structure]]
StructureName = "Pooled flat structure"
NbGroups = 1
#Group1
Group={
"Group1"
"Group2"
}
---------------------------
Distance method: Pairwise difference
--------------------------
AMOVA design and results :
--------------------------
Weir, B.S. and Cockerham, C.C. 1984.
Excoffier, L., Smouse, P., and Quattro, J. 1992.
Weir, B. S., 1996.
----------------------------------------------------------------------
Source of Sum of Variance Percentage
variation d.f. squares components of variation
----------------------------------------------------------------------
Among
populations 1 4.204 0.61000 Va 57.55
Within
populations 11 4.950 0.45000 Vb 42.45
----------------------------------------------------------------------
Total 12 9.154 1.06000
----------------------------------------------------------------------
Fixation Index FST : 0.57547
----------------------------------------------------------------------
Significance tests (1023 permutations)
------------------
Va and FST : P(rand. value > obs. value) = 0.00000
P(rand. value = obs. value) = 0.00000
P-value = 0.00000+-0.00000
Histogram of variance components null distributions
===================================================
Va
-0.09060 138
-0.06474 64
-0.03889 242
-0.01304 82
0.01281 147
0.03866 85
0.06452 17
0.09037 15
0.11622 11
0.14207 62
0.16793 27
0.19378 27
0.21963 0
0.24548 0
0.27134 0
0.29719 0
0.32304 19
0.34889 0
0.37474 1
0.40060 0
Observed values:
-----------------
Va : 0.61000000
======================================================================================
== Comparisons of pairs of population samples
======================================================================================
List of labels for population samples used below:
-------------------------------------------------
Label Population name
----- ---------------
1: Group1
2: Group2
------------------------
Population pairwise FSTs
------------------------
Distance method: Pairwise difference
1 2
1 0.00000
2 0.57547 0.00000
------------
FST P values
------------
Number of permutations : 110
1 2
1 *
2 0.00000+-0.0000 *
------------
Matrix of significant Fst P values
Significance Level=0.0500
------------
Number of permutations : 110
1 2
1 +
2 +
===============================================================================
== GENETIC STRUCTURE ANALYSIS
===============================================================================
Number of usable loci for distance computation : 554
Allowed level of missing data : 0.0000
List of usable loci :
---------------------
1 2 3 4 5 6 7 8 9 10 11 12 13 14 15
16 17 18 19 20 21 22 23 24 25 26 27 28 29 30
31 32 33 34 35 36 37 38 39 40 41 42 43 44 45
46 47 48 49 50 51 52 53 54 55 56 57 58 59 60
61 62 63 64 65 66 67 68 69 70 71 72 73 74 75
76 77 78 79 80 81 82 83 84 85 86 87 88 89 90
91 92 93 94 95 96 97 98 99 100 101 102 103 104 105
106 107 108 109 110 111 112 113 114 115 116 117 118 119 120
121 122 123 124 125 126 127 128 129 130 131 132 133 134 135
136 137 138 139 140 141 142 143 144 145 146 147 148 149 150
151 152 153 154 155 156 157 158 159 160 161 162 163 164 165
166 167 168 169 170 171 172 173 174 175 176 177 178 179 180
181 182 183 184 185 186 187 188 189 190 191 192 193 194 195
196 197 198 199 200 201 202 203 204 205 206 207 208 209 210
211 212 213 214 215 216 217 218 219 220 221 222 223 224 225
226 227 228 229 230 231 232 233 234 235 236 237 238 239 240
241 242 243 244 245 246 247 248 249 250 251 252 253 254 255
256 257 258 259 260 261 262 263 264 265 266 267 268 269 270
271 272 273 274 275 276 277 278 279 280 281 282 283 284 285
286 287 288 289 290 291 292 293 294 295 296 297 298 299 300
301 302 303 304 305 306 307 308 309 310 311 312 313 314 315
316 317 318 319 320 321 322 323 324 325 326 327 328 329 330
331 332 333 334 335 336 337 338 339 340 341 342 343 344 345
346 347 348 349 350 351 352 353 354 355 356 357 358 359 360
361 362 363 364 365 366 367 368 369 370 371 372 373 374 375
376 377 378 379 380 381 382 383 384 385 386 387 388 389 390
391 392 393 394 395 396 397 398 399 400 401 402 403 404 405
406 407 408 409 410 411 412 413 414 415 416 417 418 419 420
421 422 423 424 425 426 427 428 429 430 431 432 433 434 435
436 437 438 439 440 441 442 443 444 445 446 447 448 449 450
451 452 453 454 455 456 457 458 459 460 461 462 463 464 465
466 467 468 469 470 471 472 473 474 475 476 477 478 479 480
481 482 483 484 485 486 487 488 489 490 491 492 493 494 495
496 497 498 499 500 501 502 503 504 505 506 507 508 509 510
511 512 513 514 515 516 517 518 519 520 521 522 523 524 525
526 527 528 529 530 531 532 533 534 535 536 537 538 539 540
541 542 543 544 545 546 547 548 549 550 551 552 553 554
List of loci with too much missing data :
-----------------------------------------
NONE
=================================================================
AMOVA ANALYSIS
=================================================================
---------------------------
Genetic structure to test :
---------------------------
No. of Groups = 2
[[Structure]]
StructureName = "New Edited Structure"
NbGroups = 2
#Group1
Group={
"SUB01"
"SUB02"
}
#Group2
Group={
"SUB03"
"SUB04"
"SUB05"
"SUB06"
}
---------------------------
Distance method: Pairwise difference
--------------------------
AMOVA design and results :
--------------------------
Weir, B.S. and Cockerham, C.C. 1984.
Excoffier, L., Smouse, P., and Quattro, J. 1992.
Weir, B. S., 1996.
----------------------------------------------------------------------
Source of Sum of Variance Percentage
variation d.f. squares components of variation
----------------------------------------------------------------------
Among
groups 1 4.204 0.64079 Va 60.35
Among
populations
within
groups 4 1.283 -0.10277 Vb -9.68
Within
populations 7 3.667 0.52381 Vc 49.33
----------------------------------------------------------------------
Total 12 9.154 1.06182
----------------------------------------------------------------------
Fixation Indices
FSC : -0.24409
FST : 0.50669
FCT : 0.60348
----------------------------------------------------------------------
Significance tests (1023 permutations)
------------------
Vc and FST : P(rand. value < obs. value) = 0.05474
P(rand. value = obs. value) = 0.01564
P-value = 0.07038+-0.00882
Vb and FSC : P(rand. value > obs. value) = 0.54545
P(rand. value = obs. value) = 0.12903
P-value = 0.67449+-0.01318
Va and FCT : P(rand. value > obs. value) = 0.00000
P(rand. value = obs. value) = 0.06452
P-value = 0.06452+-0.00766
Histogram of variance components null distributions
===================================================
Va Vb Vc
-0.19083 211 -0.21420 333 0.28307 2
-0.14331 0 -0.17184 0 0.32540 2
-0.09579 78 -0.12948 0 0.36772 11
-0.04827 132 -0.08712 269 0.41005 7
-0.00075 206 -0.04476 171 0.45238 11
0.04677 202 -0.00239 0 0.49471 22
0.09429 0 0.03997 12 0.53704 42
0.14181 0 0.08233 123 0.57937 68
0.18933 0 0.12469 0 0.62169 26
0.23686 57 0.16705 0 0.66402 168
0.28438 0 0.20941 12 0.70635 54
0.33190 0 0.25177 58 0.74868 130
0.37942 0 0.29414 0 0.79101 60
0.42694 0 0.33650 0 0.83333 70
0.47446 0 0.37886 42 0.87566 129
0.52198 0 0.42122 0 0.91799 113
0.56950 0 0.46358 0 0.96032 71
0.61702 0 0.50594 3 1.00265 36
0.66455 66 0.54831 0 1.04497 0
0.71207 0 0.59067 0 1.08730 0
Observed values:
-----------------
Va : 0.64078511
Vb : -0.10277275
Vc : 0.52380952
======================================================================================
== Comparisons of pairs of population samples
======================================================================================
List of labels for population samples used below:
-------------------------------------------------
Label Population name
----- ---------------
1: SUB01
2: SUB02
3: SUB03
4: SUB04
5: SUB05
6: SUB06
------------------------
Population pairwise FSTs
------------------------
Distance method: Pairwise difference
1 2 3 4 5 6
1 0.00000
2 -0.50000 0.00000
3 0.50000 0.64706 0.00000
4 0.42857 0.50820 0.00000 0.00000
5 0.00000 0.00000 0.00000 -1.00000 0.00000
6 0.25000 0.33333 1.00000 0.50000 1.00000 0.00000
------------
FST P values
------------
Number of permutations : 110
1 2 3 4 5 6
1 *
2 0.99099+-0.0030 *
3 0.10811+-0.0378 0.09910+-0.0344 *
4 0.13514+-0.0365 0.14414+-0.0364 0.99099+-0.0030 *
5 0.99099+-0.0030 0.99099+-0.0030 0.99099+-0.0030 0.99099+-0.0030 *
6 0.99099+-0.0030 0.99099+-0.0030 0.99099+-0.0030 0.99099+-0.0030 0.99099+-0.0030 *
------------
Matrix of significant Fst P values
Significance Level=0.0500
------------
Number of permutations : 110
1 2 3 4 5 6
1 - - - - -
2 - - - - -
3 - - - - -
4 - - - - -
5 - - - - -
6 - - - - -
////////////////////////////////////////////////////////////////////
END OF RUN NUMBER 1 (10/07/17 at 16:26:39))
Total computing time for this run : 0h 0m 0s 186 ms
////////////////////////////////////////////////////////////////////

## Sheet: ai FST AMOVA
	Fst
	1	2
1	0
2	0.57547	0
1	Bouvet Island
2	South Sandwitch Islands
	Source of variation	d.f.	Sum of squares	Variance components	Percentatge of variation
	Among groups	1	4.204	0.64079	60.35
	Among populations within groups	4	1.283	-0.10277	-9.68
	Within populations	7	3.667	0.52381	49.33
	Total	12	9.154	1.06152
	FST	0.50669

## Sheet: raw data wed
AMOVA ANALYSIS
=================================================================
---------------------------
Genetic structure to test :
---------------------------
No. of Groups = 1
[[Structure]]
StructureName = "Pooled flat structure"
NbGroups = 1
#Group1
Group={
"Group1"
"Group2"
}
---------------------------
Distance method: Pairwise difference
--------------------------
AMOVA design and results :
--------------------------
Weir, B.S. and Cockerham, C.C. 1984.
Excoffier, L., Smouse, P., and Quattro, J. 1992.
Weir, B. S., 1996.
----------------------------------------------------------------------
Source of Sum of Variance Percentage
variation d.f. squares components of variation
----------------------------------------------------------------------
Among
populations 1 0.547 0.01282 Va 3.41
Within
populations 27 9.798 0.36289 Vb 96.59
----------------------------------------------------------------------
Total 28 10.345 0.37571
----------------------------------------------------------------------
Fixation Index FST : 0.03411
----------------------------------------------------------------------
Significance tests (1023 permutations)
------------------
Va and FST : P(rand. value > obs. value) = 0.13783
P(rand. value = obs. value) = 0.02053
P-value = 0.15836+-0.01165
Histogram of variance components null distributions
===================================================
Va
-0.01200 140
-0.00951 98
-0.00702 137
-0.00453 86
-0.00204 78
0.00045 75
0.00294 134
0.00543 86
0.00792 16
0.01041 0
0.01290 46
0.01539 13
0.01789 63
0.02038 3
0.02287 0
0.02536 30
0.02785 5
0.03034 12
0.03283 1
0.03532 0
Observed values:
-----------------
Va : 0.01281709
======================================================================================
== Comparisons of pairs of population samples
======================================================================================
List of labels for population samples used below:
-------------------------------------------------
Label Population name
----- ---------------
1: Group1
2: Group2
------------------------
Population pairwise FSTs
------------------------
Distance method: Pairwise difference
1 2
1 0.00000
2 0.03411 0.00000
------------
FST P values
------------
Number of permutations : 110
1 2
1 *
2 0.14414+-0.0411 *
------------
Matrix of significant Fst P values
Significance Level=0.0500
------------
Number of permutations : 110
1 2
1 -
2 -
===============================================================================
== GENETIC STRUCTURE ANALYSIS
===============================================================================
Number of usable loci for distance computation : 554
Allowed level of missing data : 0.0000
List of usable loci :
---------------------
1 2 3 4 5 6 7 8 9 10 11 12 13 14 15
16 17 18 19 20 21 22 23 24 25 26 27 28 29 30
31 32 33 34 35 36 37 38 39 40 41 42 43 44 45
46 47 48 49 50 51 52 53 54 55 56 57 58 59 60
61 62 63 64 65 66 67 68 69 70 71 72 73 74 75
76 77 78 79 80 81 82 83 84 85 86 87 88 89 90
91 92 93 94 95 96 97 98 99 100 101 102 103 104 105
106 107 108 109 110 111 112 113 114 115 116 117 118 119 120
121 122 123 124 125 126 127 128 129 130 131 132 133 134 135
136 137 138 139 140 141 142 143 144 145 146 147 148 149 150
151 152 153 154 155 156 157 158 159 160 161 162 163 164 165
166 167 168 169 170 171 172 173 174 175 176 177 178 179 180
181 182 183 184 185 186 187 188 189 190 191 192 193 194 195
196 197 198 199 200 201 202 203 204 205 206 207 208 209 210
211 212 213 214 215 216 217 218 219 220 221 222 223 224 225
226 227 228 229 230 231 232 233 234 235 236 237 238 239 240
241 242 243 244 245 246 247 248 249 250 251 252 253 254 255
256 257 258 259 260 261 262 263 264 265 266 267 268 269 270
271 272 273 274 275 276 277 278 279 280 281 282 283 284 285
286 287 288 289 290 291 292 293 294 295 296 297 298 299 300
301 302 303 304 305 306 307 308 309 310 311 312 313 314 315
316 317 318 319 320 321 322 323 324 325 326 327 328 329 330
331 332 333 334 335 336 337 338 339 340 341 342 343 344 345
346 347 348 349 350 351 352 353 354 355 356 357 358 359 360
361 362 363 364 365 366 367 368 369 370 371 372 373 374 375
376 377 378 379 380 381 382 383 384 385 386 387 388 389 390
391 392 393 394 395 396 397 398 399 400 401 402 403 404 405
406 407 408 409 410 411 412 413 414 415 416 417 418 419 420
421 422 423 424 425 426 427 428 429 430 431 432 433 434 435
436 437 438 439 440 441 442 443 444 445 446 447 448 449 450
451 452 453 454 455 456 457 458 459 460 461 462 463 464 465
466 467 468 469 470 471 472 473 474 475 476 477 478 479 480
481 482 483 484 485 486 487 488 489 490 491 492 493 494 495
496 497 498 499 500 501 502 503 504 505 506 507 508 509 510
511 512 513 514 515 516 517 518 519 520 521 522 523 524 525
526 527 528 529 530 531 532 533 534 535 536 537 538 539 540
541 542 543 544 545 546 547 548 549 550 551 552 553 554
List of loci with too much missing data :
-----------------------------------------
NONE
=================================================================
AMOVA ANALYSIS
=================================================================
---------------------------
Genetic structure to test :
---------------------------
No. of Groups = 2
[[Structure]]
StructureName = "New Edited Structure"
NbGroups = 2
#Group1
Group={
"BEN01"
"BEN02"
"BEN03"
"BEN04"
"BEN05"
"BEN06"
"BEN07"
"BEN08"
}
#Group2
Group={
"POL01"
}
---------------------------
Distance method: Pairwise difference
--------------------------
AMOVA design and results :
--------------------------
Weir, B.S. and Cockerham, C.C. 1984.
Excoffier, L., Smouse, P., and Quattro, J. 1992.
Weir, B. S., 1996.
----------------------------------------------------------------------
Source of Sum of Variance Percentage
variation d.f. squares components of variation
----------------------------------------------------------------------
Among
groups 1 0.547 -0.13048 Va -35.61
Among
populations
within
groups 7 4.685 0.24123 Vb 65.83
Within
populations 20 5.114 0.25568 Vc 69.78
----------------------------------------------------------------------
Total 28 10.345 0.36643
----------------------------------------------------------------------
Fixation Indices
FSC : 0.48546
FST : 0.30225
FCT : -0.35608
----------------------------------------------------------------------
Significance tests (1023 permutations)
------------------
Vc and FST : P(rand. value < obs. value) = 0.11339
P(rand. value = obs. value) = 0.00098
P-value = 0.11437+-0.01198
Vb and FSC : P(rand. value > obs. value) = 0.38123
P(rand. value = obs. value) = 0.00782
P-value = 0.38905+-0.01406
Va and FCT : P(rand. value > obs. value) = 0.44282
P(rand. value = obs. value) = 0.12023
P-value = 0.56305+-0.01317
Histogram of variance components null distributions
===================================================
Va Vb Vc
-0.20531 0 -0.15401 10 0.12945 4
-0.15068 254 -0.10877 20 0.15024 2
-0.09604 0 -0.06353 55 0.17104 15
-0.04141 0 -0.01829 104 0.19184 9
0.01323 0 0.02695 82 0.21264 35
0.06786 0 0.07218 153 0.23344 21
0.12250 115 0.11742 40 0.25423 56
0.17713 0 0.16266 91 0.27503 36
0.23177 115 0.20790 70 0.29583 53
0.28640 115 0.25314 63 0.31663 45
0.34104 0 0.29837 76 0.33742 39
0.39567 0 0.34361 66 0.35822 74
0.45031 0 0.38885 60 0.37902 99
0.50495 0 0.43409 54 0.39982 119
0.55958 0 0.47933 24 0.42061 138
0.61422 0 0.52457 41 0.44141 153
0.66885 0 0.56980 6 0.46221 59
0.72349 0 0.61504 8 0.48301 65
0.77812 108 0.66028 0 0.50381 0
0.83276 0 0.70552 0 0.52460 0
Observed values:
-----------------
Va : -0.13047866
Vb : 0.24123168
Vc : 0.25567766
======================================================================================
== Comparisons of pairs of population samples
======================================================================================
List of labels for population samples used below:
-------------------------------------------------
Label Population name
----- ---------------
1: BEN01
2: BEN02
3: BEN03
4: BEN04
5: BEN05
6: BEN06
7: BEN07
8: BEN08
9: POL01
------------------------
Population pairwise FSTs
------------------------
Distance method: Pairwise difference
1 2 3 4 5 6 7 8 9
1 0.00000
2 0.75000 0.00000
3 1.00000 -1.00000 0.00000
4 -0.66667 0.18085 -1.00000 0.00000
5 1.00000 0.75000 1.00000 -0.25000 0.00000
6 1.00000 -1.00000 0.00000 -1.00000 1.00000 0.00000
7 1.00000 -1.00000 0.00000 -1.00000 1.00000 0.00000 0.00000
8 1.00000 0.86667 1.00000 -0.11111 1.00000 1.00000 1.00000 0.00000
9 0.85714 0.02267 -1.00000 0.41802 0.85714 -1.00000 -1.00000 0.92593 0.00000
------------
FST P values
------------
Number of permutations : 110
1 2 3 4 5 6 7 8 9
1 *
2 0.21622+-0.0388 *
3 0.99099+-0.0030 0.99099+-0.0030 *
4 0.99099+-0.0030 0.38739+-0.0471 0.99099+-0.0030 *
5 0.99099+-0.0030 0.99099+-0.0030 0.99099+-0.0030 0.99099+-0.0030 *
6 0.99099+-0.0030 0.99099+-0.0030 0.99099+-0.0030 0.99099+-0.0030 0.99099+-0.0030 *
7 0.99099+-0.0030 0.99099+-0.0030 0.99099+-0.0030 0.99099+-0.0030 0.99099+-0.0030 0.99099+-0.0030 *
8 0.99099+-0.0030 0.99099+-0.0030 0.99099+-0.0030 0.99099+-0.0030 0.99099+-0.0030 0.99099+-0.0030 0.99099+-0.0030 *
9 0.19820+-0.0424 0.59459+-0.0511 0.99099+-0.0030 0.02703+-0.0273 0.11712+-0.0305 0.99099+-0.0030 0.99099+-0.0030 0.09910+-0.0370 *
------------
Matrix of significant Fst P values
Significance Level=0.0500
------------
Number of permutations : 110
1 2 3 4 5 6 7 8 9
1 - - - - - - - -
2 - - - - - - - -
3 - - - - - - - -
4 - - - - - - - +
5 - - - - - - - -
6 - - - - - - - -
7 - - - - - - - -
8 - - - - - - - -
9 - - - + - - - -
////////////////////////////////////////////////////////////////////
END OF RUN NUMBER 1 (10/07/17 at 16:41:21))
Total computing time for this run : 0h 0m 0s 203 ms
////////////////////////////////////////////////////////////////////

## Sheet: wed FST AMOVA
	Fst
	1	2
1	0
2	0.03411	0
1	BEN	Easternmost populations
2	POL	Westernmost populations
	Source of variation	d.f.	Sum of squares	Variance components	Percentatge of variation
	Among populations	1	0.547	0.01282	3.41
	Within populations	27	9.798	0.36289	96.59
	Total	28	10.345	0.37571
	FST	0.03411
